# Supplementary material for: Hold tight or loosen up? Functional consequences of a shift in anther architecture depend substantially on bee body size
Source: Research Square preprint supplement (doi:10.21203/rs.3.rs-1652058/v1), 2022-05-31
Supplement: Supplementary file 1 [file a097eca45dfa6573f60531bc.csv]

BeeID	ColonyID	Treatment	AbdomenPollen	HeadPollen	ThoraxPollen	CorbiculaPollen	AntherPollen	StigmaPollen	HeadWidth	VisitTime	PollinatingPollen	TotalPollen	BodyPollen
B10	Blue	Sham	5400	743	16875	79500	425700	5328	3.378222222	40.24	28346	107846	23018
B11	Blue	Cone	6210	1290	15090	211800	180000	738	3.323275862	171.007	23328	235128	22590
B13	Blue	Cone	12450	180	37830	24600	432000	216	3.15720524	154.61	50676	75276	50460
B14	Blue	Cone	3360	630	19650	190500	486450	486	3.412227074	95.05	24126	214626	23640
B15	Blue	Cone	7710	1290	37380	334200	419400	6786	3.314847162	67.12	53166	387366	46380
B18	Blue	Cone	1350	30	11820	156000	359550	666	3.504867257	91	13866	169866	13200
B2	Blue	Cone	4890	1590	6210	114900	441000	4392	3.546320346	83.265	17082	131982	12690
B3	Blue	Sham	5130	2790	24930	277500	243900	792	3.070562771	134.987	33642	311142	32850
B4	Blue	Cone	3360	180	5190	57300	666900	1206	3.415350877	104.75	9936	67236	8730
B5	Blue	Sham	558	330	14108	63180	424800	3252	3.343347639	103.64	18248	81428	14996
B6	Blue	Cone	2730	150	11670	147900	690300	972	3.235652174	97.54	15522	163422	14550
B7	Blue	Sham	1050	30	2490	51600	501300	324	3.23982684	68.33	3894	55494	3570
B8	Blue	Sham	4830	450	6270	260100	251550	4356	3.349779736	135.436	15906	276006	11550
B9	Blue	Cone	7140	1320	28560	173100	474300	1692	3.298245614	76.28	38712	211812	37020
O1	Orange	Cone	3930	570	12900	227700	155700	5220	3.83245614	144.44	22620	250320	17400
O19	Orange	Cone	5010	240	19680	157200	418050	180	3.766666667	119.78	25110	182310	24930
O2	Orange	Sham	8250	1680	27960	299400	89550	5562	3.690789474	205.38	43452	342852	37890
O20	Orange	Sham	22470	2190	35640	79200	98100	72	3.971391417	115.58	60372	139572	60300
O21	Orange	Cone	6840	3150	24120	279900		54	3.983094928	194.38	34164	314064	34110
O22	Orange	Cone	2880	270	4920	210900	176400	432	3.637156563	666.93	8502	219402	8070
O24	Orange	Cone	12780	2040	24720	307200	71550	4986	3.633189655	176.16	44526	351726	39540
O25	Orange	Sham	35490	3150	77100	256800	65700	3564	3.395689655	200.15	119304	376104	115740
O26	Orange	Cone	10470	210	8370	195300	167850	684	3.470562582	156.53	19734	215034	19050
O27	Orange	Sham	3720	300	7020	161700	174600	2268	3.429824561	328.87	13308	175008	11040
O28	Orange	Sham	21060	990	21750	281400	96750	1152	3.644690265	211.43	44952	326352	43800
O29	Orange	Sham	7920	2070	15090	489300	69750	162	3.82773659	311.45	25242	514542	25080
O3	Orange	Cone	4050	330	9720	180600	169200	1656	3.777922078	147.802	15756	196356	14100
O4	Orange	Sham	18000	1080	29070	222600	239400	2754	3.511403509	283.441	50904	273504	48150
O6	Orange	Cone	2910	240	4380	203700	275850	1026	3.858189655	190.43	8556	212256	7530
O7	Orange	Sham	21090	1110	21960	134700	289800	342	3.927192982	382.99	44502	179202	44160
O8	Orange	Cone	7050	210	5580	177300	118800	288	3.624137931	288.74	13128	190428	12840
O9	Orange	Sham	2640	1350	10410	66300	248850	48	3.739912281	312.98	14448	80748	14400
R10	Red	Sham	13110	5070	61950	289500	211950	8379	3.313478261	105.18	88509	378009	80130
R11	Red	Cone	840	3720	15270	175200		8946	3.521491228	104.33	28776	203976	19830
R110	Red	Cone	2280	1620	26490	330000	300600	10494	3.50877193	210.34	40884	370884	30390
R12	Red	Cone	7830	1560	19860	320400	380250	522	3.474336283	104.55	29772	350172	29250
R120	Red	Sham	2010	420	8670	185100	448200	1440	3.487719298	115.49	12540	197640	11100
R13	Red	Sham	15000	2730	31860	290700	224100	3150	3.386521739	133.93	52740	343440	49590
R130	Red	Cone	2520	660	17670	82500	312300	612	3.230088496	178.85	21462	103962	20850
R14	Red	Sham	11130	1140	37920	377700	392850	774	3.734649123	50.02	50964	428664	50190
R140	Red	Sham	4380	570	10080	234900	463500	990	3.436842105	271.31	16020	250920	15030
R15	Red	Cone	2723	293	10350	7650	765900	14760	3.378070175	160.44	28126	35776	13366
R150	Red	Cone	3360	840	10890	30900		5580		139.24	20670	51570	15090
R16	Red	Sham	4860	585	17528	276975	343800	1620	3.339473684	73.47	24593	301568	22973
R160	Red	Cone	2400	90	7620	188100	567450	648	3.603070175	193.66	10758	198858	10110
R17	Red	Sham	7200	4110	41700	351300	121500	6246	3.334347826	117.2	59256	410556	53010
R170	Red	Cone	4890	570	9810	88500	305550	1656	3.256578947	302.69	16926	105426	15270
R18	Red	Cone	2730	750	21090	127200	337950	522	3.332894737	177.05	25092	152292	24570
R19	Red	Sham	3263	270	11498	178200	273600	2826	3.18173913	122.22	17857	196057	15031
R190	Red	Cone	5400	390	13800	163500	328950	4392	3.619736842	118.02	23982	187482	19590
R21	Red	Cone	2475	540	8235	29025	463950	11142	3.027192982	72.193	22392	51417	11250
R22	Red	Sham	6330	180	24750	297900	206550	18072	3.527192982	198.05	49332	347232	31260
R23	Red	Sham	6900	1260	48630	152100	189000	1944	3.235526316	181.04	58734	210834	56790
R24	Red	Cone	3420	240	11910	99300	747900	3024	3.526548673	139.63	18594	117894	15570
R25	Red	Sham	7860	300	19170	176700	175950	8028	3.350438596	123.76	35358	212058	27330
R26	Red	Sham	1283	288	11070	88650	390150	288	3.015350877	119.13	12929	101579	12641
R27	Red	Cone	5418	1035	3438	39780	450450	9000	3.410869565	375.5	18891	58671	9891
R28	Red	Sham	660	930	18390	202800	185400	25056	3.431304348	72.7	45036	247836	19980
R29	Red	Sham	1530	1418	15908	101700	234900	1332	3.358695652	143.3	20188	121888	18856
R9	Red	Cone	3660	1560	23910	214200	458100	72	3.344298246	122.1	29202	243402	29130
